# Supplementary material for: Crystal Structure of the Human Cytomegalovirus Glycoprotein B
Source: PubMed Central journal article supplement (PMC4617298; doi:10.1371/journal.ppat.1005227), 2015-10-20
Supplement: ppat.1005227.s008.pdf [file ppat.1005227.s008.pdf]

| Domain      |          | HSV-1                        | HCMV             | EBV                     |
|-------------|----------|------------------------------|------------------|-------------------------|
| <b>DI</b>   | Chain B  |                              |                  |                         |
|             | Residues | 154-363                      | 133-343          | 89-294                  |
|             | RMSD     | 2.002                        |                  | 1.587                   |
| <b>DII</b>  | Chain B  |                              |                  |                         |
|             | Residues | 142-153, 364-476             | 121-132, 344-438 | 7-88, 295-390           |
|             | RMSD     | 0.833                        |                  | 0.991                   |
| <b>DIII</b> | Chain B  |                              |                  |                         |
|             | Residues | 117-133, 500-572,<br>661-669 |                  | 52-68, 455-527, 617-624 |
|             | RMSD     | 1.396                        |                  | 1.015                   |
| <b>DIV</b>  | Chain B  |                              |                  |                         |
|             | Residues | 111-116, 573-660             | 87-95, 549-637   | 42-51, 528-616          |
|             | RMSD     | 1.354                        |                  | 0.985                   |
| <b>DV</b>   | Trimer   |                              |                  |                         |
|             | Residues | 670-725                      | 647-698          | 625-679                 |
|             | RMSD     | 3.286                        |                  | 2.334                   |
