# Supplementary material for: Crystal Structure of the Human Cytomegalovirus Glycoprotein B
Source: PLoS Pathog. 2015 Oct 20;11(10):e1005227. doi: 10.1371/journal.ppat.1005227 (PMC4617298; doi:10.1371/journal.ppat.1005227)
Supplement: S4 Fig — Sixty HCMV gB sequences from clinical and laboratory-adapted strains, downloaded from NCBI’s RefSeq data base, were aligned and analyzed using ClustalW2 [32] and ESPript 3.x [33]. Identical residues are shown as white text on red background and similar residues are highlighted in yellow. (PDF) [file ppat.1005227.s004.pdf]

|              | 90                | 100 | 110 | 120 | 130               | 140           | 150     | 160 | 170          | 180      |
|--------------|-------------------|-----|-----|-----|-------------------|---------------|---------|-----|--------------|----------|
| HAN13        | YPRVCSMAQGTDLIRFE | RNI | VT  | M   | KPINEDLDGIMVVKRNI | VAHTFKVRYQKVL | TFRSSYA | IHT | YLLGSNTEVAPP | MPMEIHHN |
| BE/6/2011    | YPRVCSMAQGTDLIRFE | RNI | VT  | M   | KPINEDLDGIMVVKRNI | VAHTFKVRYQKVL | TFRSSYA | IHT | YLLGSNTEVAPP | MPMEIHHN |
| BE/3/7/2011  | YPRVCSMAQGTDLIRFE | RNI | VT  | M   | KPINEDLDGIMVVKRNI | VAHTFKVRYQKVL | TFRSSYA | IHT | YLLGSNTEVAPP | MPMEIHHN |
| YR1814       | YPRVCSMAQGTDLIRFE | RNI | VT  | M   | KPINEDLDGIMVVKRNI | VAHTFKVRYQKVL | TFRSSYA | IHT | YLLGSNTEVAPP | MPMEIHHN |
| HAN1         | YPRVCSMAQGTDLIRFE | RNI | VT  | M   | KPINEDLDGIMVVKRNI | VAHTFKVRYQKVL | TFRSSYA | IHT | YLLGSNTEVAPP | MPMEIHHN |
| COT76A       | YPRVCSMAQGTDLIRFE | RNI | VT  | M   | KPINEDLDGIMVVKRNI | VAHTFKVRYQKVL | TFRSSYA | IHT | YLLGSNTEVAPP | MPMEIHHN |
| HAN3         | YPRVCSMAQGTDLIRFE | RNI | VT  | M   | KPINEDLDGIMVVKRNI | VAHTFKVRYQKVL | TFRSSYA | IHT | YLLGSNTEVAPP | MPMEIHHN |
| BE/4/2/2011  | YPRVCSMAQGTDLIRFE | RNI | VT  | M   | KPINEDLDGIMVVKRNI | VAHTFKVRYQKVL | TFRSSYA | IHT | YLLGSNTEVAPP | MPMEIHHN |
| JHC          | YPRVCSMAQGTDLIRFE | RNI | VT  | M   | KPINEDLDGIMVVKRNI | VAHTFKVRYQKVL | TFRSSYA | IHT | YLLGSNTEVAPP | MPMEIHHN |
| BE/13/1/2010 | YPRVCSMAQGTDLIRFE | RNI | VT  | M   | KPINEDLDGIMVVKRNI | VAHTFKVRYQKVL | TFRSSYA | IHT | YLLGSNTEVAPP | MPMEIHHN |
| BE/35/2011   | YPRVCSMAQGTDLIRFE | RNI | VT  | M   | KPINEDLDGIMVVKRNI | VAHTFKVRYQKVL | TFRSSYA | IHT | YLLGSNTEVAPP | MPMEIHHN |
| Toledo       | YPRVCSMAQGTDLIRFE | RNI | VT  | M   | KPINEDLDGIMVVKRNI | VAHTFKVRYQKVL | TFRSSYA | IHT | YLLGSNTEVAPP | MPMEIHHN |
| C354A        | YPRVCSMAQGTDLIRFE | RNI | VT  | M   | KPINEDLDGIMVVKRNI | VAHTFKVRYQKVL | TFRSSYA | IHT | YLLGSNTEVAPP | MPMEIHHN |
| C359A        | YPRVCSMAQGTDLIRFE | RNI | VT  | M   | KPINEDLDGIMVVKRNI | VAHTFKVRYQKVL | TFRSSYA | IHT | YLLGSNTEVAPP | MPMEIHHN |
| BE/15/2011   | YPRVCSMAQGTDLIRFE | RNI | VT  | M   | KPINEDLDGIMVVKRNI | VAHTFKVRYQKVL | TFRSSYA | IHT | YLLGSNTEVAPP | MPMEIHHN |
| HAN38        | YPRVCSMAQGTDLIRFE | RNI | VT  | M   | KPINEDLDGIMVVKRNI | VAHTFKVRYQKVL | TFRSSYA | IHT | YLLGSNTEVAPP | MPMEIHHN |
| AD169        | YPRVCSMAQGTDLIRFE | RNI | VT  | M   | KPINEDLDGIMVVKRNI | VAHTFKVRYQKVL | TFRSSYA | IHT | YLLGSNTEVAPP | MPMEIHHN |
| 6397         | YPRVCSMAQGTDLIRFE | RNI | VT  | M   | KPINEDLDGIMVVKRNI | VAHTFKVRYQKVL | TFRSSYA | IHT | YLLGSNTEVAPP | MPMEIHHN |
| BE/11/2010   | YPRVCSMAQGTDLIRFE | RNI | VT  | M   | KPINEDLDGIMVVKRNI | VAHTFKVRYQKVL | TFRSSYA | IHT | YLLGSNTEVAPP | MPMEIHHN |
| C336A        | YPRVCSMAQGTDLIRFE | RNI | VT  | M   | KPINEDLDGIMVVKRNI | VAHTFKVRYQKVL | TFRSSYA | IHT | YLLGSNTEVAPP | MPMEIHHN |
| HAN16        | YPRVCSMAQGTDLIRFE | RNI | VT  | M   | KPINEDLDGIMVVKRNI | VAHTFKVRYQKVL | TFRSSYA | IHT | YLLGSNTEVAPP | MPMEIHHN |
| BE/16/2012   | YPRVCSMAQGTDLIRFE | RNI | VT  | M   | KPINEDLDGIMVVKRNI | VAHTFKVRYQKVL | TFRSSYA | IHT | YLLGSNTEVAPP | MPMEIHHN |
| BE/15/2012   | YPRVCSMAQGTDLIRFE | RNI | VT  | M   | KPINEDLDGIMVVKRNI | VAHTFKVRYQKVL | TFRSSYA | IHT | YLLGSNTEVAPP | MPMEIHHN |
| C338A        | YPRVCSMAQGTDLIRFE | RNI | VT  | M   | KPINEDLDGIMVVKRNI | VAHTFKVRYQKVL | TFRSSYA | IHT | YLLGSNTEVAPP | MPMEIHHN |
| PAV11        | YPRVCSMAQGTDLIRFE | RNI | VT  | M   | KPINEDLDGIMVVKRNI | VAHTFKVRYQKVL | TFRSSYA | IHT | YLLGSNTEVAPP | MPMEIHHN |
| C325A        | YPRVCSMAQGTDLIRFE | RNI | VT  | M   | KPINEDLDGIMVVKRNI | VAHTFKVRYQKVL | TFRSSYA | IHT | YLLGSNTEVAPP | MPMEIHHN |
| BE/4/2/2011  | YPRVCSMAQGTDLIRFE | RNI | VT  | M   | KPINEDLDGIMVVKRNI | VAHTFKVRYQKVL | TFRSSYA | IHT | YLLGSNTEVAPP | MPMEIHHN |
| HAN          | YPRVCSMAQGTDLIRFE | RNI | VT  | M   | KPINEDLDGIMVVKRNI | VAHTFKVRYQKVL | TFRSSYA | IHT | YLLGSNTEVAPP | MPMEIHHN |
| 7            | YPRVCSMAQGTDLIRFE | RNI | VT  | M   | KPINEDLDGIMVVKRNI | VAHTFKVRYQKVL | TFRSSYA | IHT | YLLGSNTEVAPP | MPMEIHHN |
| BE/19/2011   | YPRVCSMAQGTDLIRFE | RNI | VT  | M   | KPINEDLDGIMVVKRNI | VAHTFKVRYQKVL | TFRSSYA | IHT | YLLGSNTEVAPP | MPMEIHHN |
| C194A        | YPRVCSMAQGTDLIRFE | RNI | VT  | M   | KPINEDLDGIMVVKRNI | VAHTFKVRYQKVL | TFRSSYA | IHT | YLLGSNTEVAPP | MPMEIHHN |
| BE/2/2012    | YPRVCSMAQGTDLIRFE | RNI | VT  | M   | KPINEDLDGIMVVKRNI | VAHTFKVRYQKVL | TFRSSYA | IHT | YLLGSNTEVAPP | MPMEIHHN |
| CZ/2/2012    | YPRVCSMAQGTDLIRFE | RNI | VT  | M   | KPINEDLDGIMVVKRNI | VAHTFKVRYQKVL | TFRSSYA | IHT | YLLGSNTEVAPP | MPMEIHHN |
| C128A        | YPRVCSMAQGTDLIRFE | RNI | VT  | M   | KPINEDLDGIMVVKRNI | VAHTFKVRYQKVL | TFRSSYA | IHT | YLLGSNTEVAPP | MPMEIHHN |
| HAN2         | YPRVCSMAQGTDLIRFE | RNI | VT  | M   | KPINEDLDGIMVVKRNI | VAHTFKVRYQKVL | TFRSSYA | IHT | YLLGSNTEVAPP | MPMEIHHN |
| CO82A        | YPRVCSMAQGTDLIRFE | RNI | VT  | M   | KPINEDLDGIMVVKRNI | VAHTFKVRYQKVL | TFRSSYA | IHT | YLLGSNTEVAPP | MPMEIHHN |
| Merlin       | YPRVCSMAQGTDLIRFE | RNI | VT  | M   | KPINEDLDGIMVVKRNI | VAHTFKVRYQKVL | TFRSSYA | IHT | YLLGSNTEVAPP | MPMEIHHN |
| BE/14/2011   | YPRVCSMAQGTDLIRFE | RNI | VT  | M   | KPINEDLDGIMVVKRNI | VAHTFKVRYQKVL | TFRSSYA | IHT | YLLGSNTEVAPP | MPMEIHHN |
| BE/27/2010   | YPRVCSMAQGTDLIRFE | RNI | VT  | M   | KPINEDLDGIMVVKRNI | VAHTFKVRYQKVL | TFRSSYA | IHT | YLLGSNTEVAPP | MPMEIHHN |
| Towne_varL   | YPRVCSMAQGTDLIRFE | RNI | VT  | M   | KPINEDLDGIMVVKRNI | VAHTFKVRYQKVL | TFRSSYA | IHT | YLLGSNTEVAPP | MPMEIHHN |
| 3157         | YPRVCSMAQGTDLIRFE | RNI | VT  | M   | KPINEDLDGIMVVKRNI | VAHTFKVRYQKVL | TFRSSYA | IHT | YLLGSNTEVAPP | MPMEIHHN |
| Towne        | YPRVCSMAQGTDLIRFE | RNI | VT  | M   | KPINEDLDGIMVVKRNI | VAHTFKVRYQKVL | TFRSSYA | IHT | YLLGSNTEVAPP | MPMEIHHN |
| BE/17/2010   | YPRVCSMAQGTDLIRFE | RNI | VT  | M   | KPINEDLDGIMVVKRNI | VAHTFKVRYQKVL | TFRSSYA | IHT | YLLGSNTEVAPP | MPMEIHHN |
| BE/48/2011   | YPRVCSMAQGTDLIRFE | RNI | VT  | M   | KPINEDLDGIMVVKRNI | VAHTFKVRYQKVL | TFRSSYA | IHT | YLLGSNTEVAPP | MPMEIHHN |
| TB40/E       | YPRVCSMAQGTDLIRFE | RNI | VT  | M   | KPINEDLDGIMVVKRNI | VAHTFKVRYQKVL | TFRSSYA | IHT | YLLGSNTEVAPP | MPMEIHHN |
| BE/5/2011    | YPRVCSMAQGTDLIRFE | RNI | VT  | M   | KPINEDLDGIMVVKRNI | VAHTFKVRYQKVL | TFRSSYA | IHT | YLLGSNTEVAPP | MPMEIHHN |
| BE/32/2011   | YPRVCSMAQGTDLIRFE | RNI | VT  | M   | KPINEDLDGIMVVKRNI | VAHTFKVRYQKVL | TFRSSYA | IHT | YLLGSNTEVAPP | MPMEIHHN |
| C327A        | YPRVCSMAQGTDLIRFE | RNI | VT  | M   | KPINEDLDGIMVVKRNI | VAHTFKVRYQKVL | TFRSSYA | IHT | YLLGSNTEVAPP | MPMEIHHN |
| C178A        | YPRVCSMAQGTDLIRFE | RNI | VT  | M   | KPINEDLDGIMVVKRNI | VAHTFKVRYQKVL | TFRSSYA | IHT | YLLGSNTEVAPP | MPMEIHHN |
| BE/38/2011   | YPRVCSMAQGTDLIRFE | RNI | VT  | M   | KPINEDLDGIMVVKRNI | VAHTFKVRYQKVL | TFRSSYA | IHT | YLLGSNTEVAPP | MPMEIHHN |
| HAN12        | YPRVCSMAQGTDLIRFE | RNI | VT  | M   | KPINEDLDGIMVVKRNI | VAHTFKVRYQKVL | TFRSSYA | IHT | YLLGSNTEVAPP | MPMEIHHN |
| BE/13/2012   | YPRVCSMAQGTDLIRFE | RNI | VT  | M   | KPINEDLDGIMVVKRNI | VAHTFKVRYQKVL | TFRSSYA | IHT | YLLGSNTEVAPP | MPMEIHHN |
| 5510-E115    | YPRVCSMAQGTDLIRFE | RNI | VT  | M   | KPINEDLDGIMVVKRNI | VAHTFKVRYQKVL | TFRSSYA | IHT | YLLGSNTEVAPP | MPMEIHHN |
| BE/22/2010   | YPRVCSMAQGTDLIRFE | RNI | VT  | M   | KPINEDLDGIMVVKRNI | VAHTFKVRYQKVL | TFRSSYA | IHT | YLLGSNTEVAPP | MPMEIHHN |
| TR           | YPRVCSMAQGTDLIRFE | RNI | VT  | M   | KPINEDLDGIMVVKRNI | VAHTFKVRYQKVL | TFRSSYA | IHT | YLLGSNTEVAPP | MPMEIHHN |
| BE/4/2/2010  | YPRVCSMAQGTDLIRFE | RNI | VT  | M   | KPINEDLDGIMVVKRNI | VAHTFKVRYQKVL | TFRSSYA | IHT | YLLGSNTEVAPP | MPMEIHHN |
| JP           | YPRVCSMAQGTDLIRFE | RNI | VT  | M   | KPINEDLDGIMVVKRNI | VAHTFKVRYQKVL | TFRSSYA | IHT | YLLGSNTEVAPP | MPMEIHHN |
| HAN19        | YPRVCSMAQGTDLIRFE | RNI | VT  | M   | KPINEDLDGIMVVKRNI | VAHTFKVRYQKVL | TFRSSYA | IHT | YLLGSNTEVAPP | MPMEIHHN |
| UKNEQAS1     | YPRVCSMAQGTDLIRFE | RNI | VT  | M   | KPINEDLDGIMVVKRNI | VAHTFKVRYQKVL | TFRSSYA | IHT | YLLGSNTEVAPP | MPMEIHHN |
| S3           | YPRVCSMAQGTDLIRFE | RNI | VT  | M   | KPINEDLDGIMVVKRNI | VAHTFKVRYQKVL | TFRSSYA | IHT | YLLGSNTEVAPP | MPMEIHHN |

|            | 280 | 290         | 300                    | 310 | 320 | 330         | 340                     | 350      | 360 |
|------------|-----|-------------|------------------------|-----|-----|-------------|-------------------------|----------|-----|
| HAN13      | VVD | ISPFYNGTNRN | SYFGENADKFFIFPNNTIVSDR | GRN | SA  | ETHRLLVAFLE | RASVISWDIODEKNVTQLTFWEA | SERTIRSE | AS  |
| BE/6/2011  | VD  | ISPFYNGTNRN | SYFGENADKFFIFPNNTIVSDR | GRN | SA  | ETHRLLVAFLE | RASVISWDIODEKNVTQLTFWEA | SERTIRSE | AS  |
| BE/37/2011 | VVD | ISPFYNGTNRN | SYFGENADKFFIFPNNTIVSDR | GRN | SA  | ETHRLLVAFLE | RASVISWDIODEKNVTQLTFWEA | SERTIRSE | AS  |
| VR1814     | VVD | ISPFYNGTNRN | SYFGENADKFFIFPNNTIVSDR | GRN | SA  | ETHRLLVAFLE | RASVISWDIODEKNVTQLTFWEA | SERTIRSE | AS  |
| CO76A      | VVD | ISPFYNGTNRN | SYFGENADKFFIFPNNTIVSDR | GRN | SA  | ETHRLLVAFLE | RASVISWDIODEKNVTQLTFWEA | SERTIRSE | AS  |
| HAN3       | VVD | ISPFYNGTNRN | SYFGENADKFFIFPNNTIVSDR | GRN | SA  | ETHRLLVAFLE | RASVISWDIODEKNVTQLTFWEA | SERTIRSE | AS  |
| BE/42/2011 | VVD | ISPFYNGTNRN | SYFGENADKFFIFPNNTIVSDR | GRN | SA  | ETHRLLVAFLE | RASVISWDIODEKNVTQLTFWEA | SERTIRSE | AS  |
| JHC        | VVD | ISPFYNGTNRN | SYFGENADKFFIFPNNTIVSDR | GRN | SA  | ETHRLLVAFLE | RASVISWDIODEKNVTQLTFWEA | SERTIRSE | AS  |
| BE/13/2010 | VVD | ISPFYNGTNRN | SYFGENADKFFIFPNNTIVSDR | GRN | SA  | ETHRLLVAFLE | RASVISWDIODEKNVTQLTFWEA | SERTIRSE | AS  |
| BE/35/2011 | VVD | ISPFYNGTNRN | SYFGENADKFFIFPNNTIVSDR | GRN | SA  | ETHRLLVAFLE | RASVISWDIODEKNVTQLTFWEA | SERTIRSE | AS  |
| Toledo     | VVD | ISPFYNGTNRN | SYFGENADKFFIFPNNTIVSDR | GRN | SA  | ETHRLLVAFLE | RASVISWDIODEKNVTQLTFWEA | SERTIRSE | AS  |
| C354A      | VVD | ISPFYNGTNRN | SYFGENADKFFIFPNNTIVSDR | GRN | SA  | ETHRLLVAFLE | RASVISWDIODEKNVTQLTFWEA | SERTIRSE | AS  |
| C359A      | VVD | ISPFYNGTNRN | SYFGENADKFFIFPNNTIVSDR | GRN | SA  | ETHRLLVAFLE | RASVISWDIODEKNVTQLTFWEA | SERTIRSE | AS  |
| BE/15/2011 | VVD | ISPFYNGTNRN | SYFGENADKFFIFPNNTIVSDR | GRN | SA  | ETHRLLVAFLE | RASVISWDIODEKNVTQLTFWEA | SERTIRSE | AS  |
| HAN38      | VVD | ISPFYNGTNRN | SYFGENADKFFIFPNNTIVSDR | GRN | SA  | ETHRLLVAFLE | RASVISWDIODEKNVTQLTFWEA | SERTIRSE | AS  |
| AD169      | VVD | ISPFYNGTNRN | SYFGENADKFFIFPNNTIVSDR | GRN | SA  | ETHRLLVAFLE | RASVISWDIODEKNVTQLTFWEA | SERTIRSE | AS  |
| 6397       | VVD | ISPFYNGTNRN | SYFGENADKFFIFPNNTIVSDR | GRN | SA  | ETHRLLVAFLE | RASVISWDIODEKNVTQLTFWEA | SERTIRSE | AS  |
| BE/11/2010 | VVD | ISPFYNGTNRN | SYFGENADKFFIFPNNTIVSDR | GRN | SA  | ETHRLLVAFLE | RASVISWDIODEKNVTQLTFWEA | SERTIRSE | AS  |
| C336A      | VVD | ISPFYNGTNRN | SYFGENADKFFIFPNNTIVSDR | GRN | SA  | ETHRLLVAFLE | RASVISWDIODEKNVTQLTFWEA | SERTIRSE | AS  |
| HAN16      | VVD | ISPFYNGTNRN | SYFGENADKFFIFPNNTIVSDR | GRN | SA  | ETHRLLVAFLE | RASVISWDIODEKNVTQLTFWEA | SERTIRSE | AS  |
| BE/16/2012 | VVD | ISPFYNGTNRN | SYFGENADKFFIFPNNTIVSDR | GRN | SA  | ETHRLLVAFLE | RASVISWDIODEKNVTQLTFWEA | SERTIRSE | AS  |
| BE/15/2012 | VVD | ISPFYNGTNRN | SYFGENADKFFIFPNNTIVSDR | GRN | SA  | ETHRLLVAFLE | RASVISWDIODEKNVTQLTFWEA | SERTIRSE | AS  |
| C338A      | VVD | ISPFYNGTNRN | SYFGENADKFFIFPNNTIVSDR | GRN | SA  | ETHRLLVAFLE | RASVISWDIODEKNVTQLTFWEA | SERTIRSE | AS  |
| FAV21      | VVD | ISPFYNGTNRN | SYFGENADKFFIFPNNTIVSDR | GRN | SA  | ETHRLLVAFLE | RASVISWDIODEKNVTQLTFWEA | SERTIRSE | AS  |
| C325A      | VVD | ISPFYNGTNRN | SYFGENADKFFIFPNNTIVSDR | GRN | SA  | ETHRLLVAFLE | RASVISWDIODEKNVTQLTFWEA | SERTIRSE | AS  |
| BE/4/2012  | VVD | ISPFYNGTNRN | SYFGENADKFFIFPNNTIVSDR | GRN | SA  | ETHRLLVAFLE | RASVISWDIODEKNVTQLTFWEA | SERTIRSE | AS  |
| HAN        | VVD | ISPFYNGTNRN | SYFGENADKFFIFPNNTIVSDR | GRN | SA  | ETHRLLVAFLE | RASVISWDIODEKNVTQLTFWEA | SERTIRSE | AS  |
| BE/19/2011 | VVD | ISPFYNGTNRN | SYFGENADKFFIFPNNTIVSDR | GRN | SA  | ETHRLLVAFLE | RASVISWDIODEKNVTQLTFWEA | SERTIRSE | AS  |
| C194A      | VVD | ISPFYNGTNRN | SYFGENADKFFIFPNNTIVSDR | GRN | SA  | ETHRLLVAFLE | RASVISWDIODEKNVTQLTFWEA | SERTIRSE | AS  |
| BE/5/2012  | VVD | ISPFYNGTNRN | SYFGENADKFFIFPNNTIVSDR | GRN | SA  | ETHRLLVAFLE | RASVISWDIODEKNVTQLTFWEA | SERTIRSE | AS  |
| CZ/2/2012  | VVD | ISPFYNGTNRN | SYFGENADKFFIFPNNTIVSDR | GRN | SA  | ETHRLLVAFLE | RASVISWDIODEKNVTQLTFWEA | SERTIRSE | AS  |
| C128A      | VVD | ISPFYNGTNRN | SYFGENADKFFIFPNNTIVSDR | GRN | SA  | ETHRLLVAFLE | RASVISWDIODEKNVTQLTFWEA | SERTIRSE | AS  |
| HAN2       | VVD | ISPFYNGTNRN | SYFGENADKFFIFPNNTIVSDR | GRN | SA  | ETHRLLVAFLE | RASVISWDIODEKNVTQLTFWEA | SERTIRSE | AS  |
| CO82A      | VVD | ISPFYNGTNRN | SYFGENADKFFIFPNNTIVSDR | GRN | SA  | ETHRLLVAFLE | RASVISWDIODEKNVTQLTFWEA | SERTIRSE | AS  |
| Merlin     | VVD | ISPFYNGTNRN | SYFGENADKFFIFPNNTIVSDR | GRN | SA  | ETHRLLVAFLE | RASVISWDIODEKNVTQLTFWEA | SERTIRSE | AS  |
| BE/14/2011 | VVD | ISPFYNGTNRN | SYFGENADKFFIFPNNTIVSDR | GRN | SA  | ETHRLLVAFLE | RASVISWDIODEKNVTQLTFWEA | SERTIRSE | AS  |
| BE/27/2010 | VVD | ISPFYNGTNRN | SYFGENADKFFIFPNNTIVSDR | GRN | SA  | ETHRLLVAFLE | RASVISWDIODEKNVTQLTFWEA | SERTIRSE | AS  |
| Towne_varL | VVD | ISPFYNGTNRN | SYFGENADKFFIFPNNTIVSDR | GRN | SA  | ETHRLLVAFLE | RASVISWDIODEKNVTQLTFWEA | SERTIRSE | AS  |
| 3157       | VVD | ISPFYNGTNRN |                        |     |     |             |                         |          |     |
